# Supplementary material for: Functional Magnetic Resonance Imaging Study of Apathy in Alzheimer’s Disease
Source: Atypon-hosted journal article supplement (doi:10.1176/appi.neuropsych.12110261), 2014-02-25
Supplement: 134_ds002.pdf [file 134_ds002.pdf]

Supplement 2: Average Degree of Recognition and Emotional Intensity of Pictures of  
Pre-Stimuli and Stimuli

|             | Degree of recognition | Emotional intensity |
|-------------|-----------------------|---------------------|
| PRE-STIMULI |                       |                     |
| Happy       | 95.18                 | 5.21                |
| Neutral     | 84.45                 | 5.61                |
| Sad         | 83.18                 | 5.30                |
| STIMULI     |                       |                     |
| Happy       | 99.27                 | 5.91                |
| Neutral     | 90.03                 | 5.70                |
| Sad         | 88.95                 | 6.39                |
