# Supplementary material for: Functional Magnetic Resonance Imaging Study of Apathy in Alzheimer’s Disease
Source: Atypon-hosted journal article supplement (doi:10.1176/appi.neuropsych.12110261), 2014-02-25
Supplement: 134_ds003.pdf [file 134_ds003.pdf]

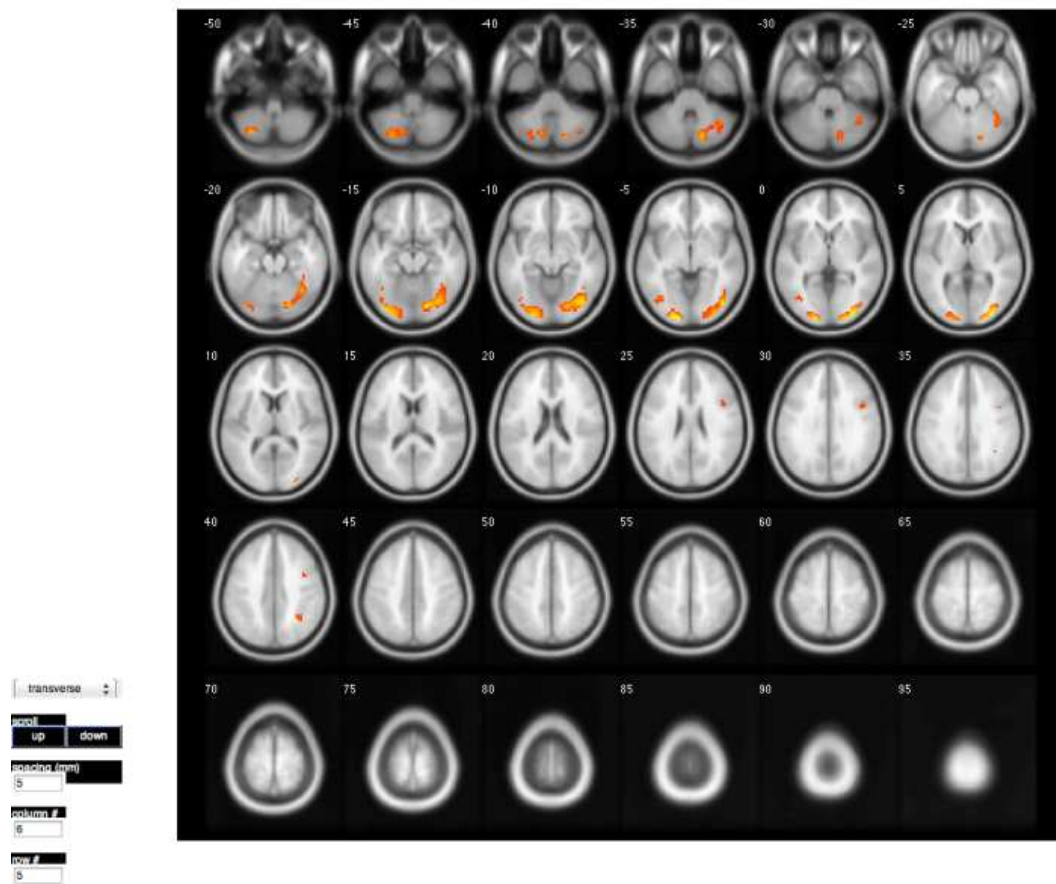

Imaging of apathy patients under neutral stimuli

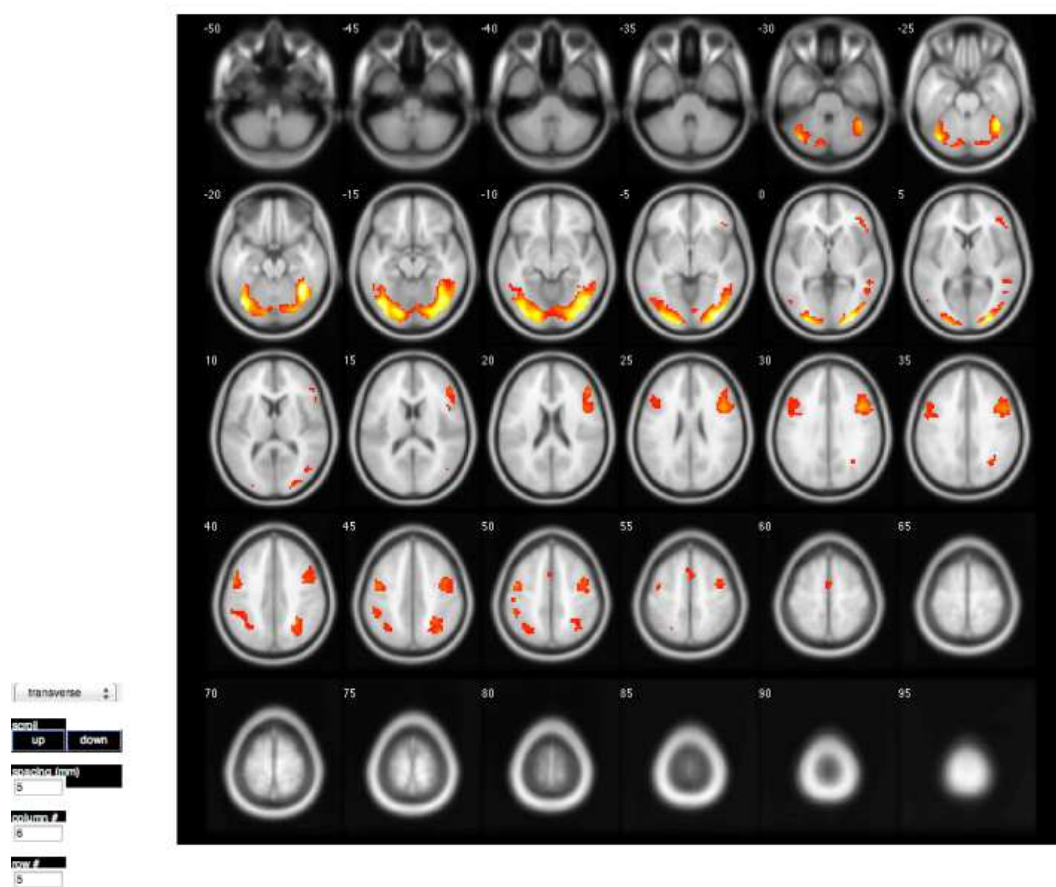

Imaging of nonpathy patients under neutral stimuli

| z mm           | Label | % Cluster          | Nb Vx Cluster | % Label             | Nb Vx Label |      |       |      |
|----------------|-------|--------------------|---------------|---------------------|-------------|------|-------|------|
| -85            | -5    | <u>Fusiform_R</u>  | 12.60         | 1921                | 32.44       | 2518 |       |      |
|                |       | <u>Fusiform_L</u>  | 9.16          | 1921                | 25.71       | 2310 |       |      |
|                |       | Cerebellum_6_R     | 9.01          | 1921                | 32.53       | 1795 |       |      |
|                |       | Cerebellum_Crus1_L | 7.39          | 1921                | 18.41       | 2603 |       |      |
|                |       | Occipital_Inf_L    | 7.29          | 1921                | 50.21       | 941  |       |      |
|                |       | Temporal_Inf_R     | 6.40          | 1921                | 11.67       | 3557 |       |      |
|                |       | Lingual_R          | 6.35          | 1921                | 17.90       | 2380 |       |      |
|                |       | Cerebellum_6_L     | 5.52          | 1921                | 21.12       | 1694 |       |      |
|                |       | Occipital_Inf_R    | 5.52          | 1921                | 36.17       | 989  |       |      |
|                |       | Lingual_L          | 5.15          | 1921                | 15.95       | 2095 |       |      |
|                |       | Occipital_Mid_L    | 4.69          | 1921                | 9.29        | 1270 |       |      |
|                |       | Temporal_Mid_R     | 4.63          | 1921                | 6.01        | 4409 |       |      |
|                |       | OUTSIDE            | 3.64          | 1921                | 0.00        | 0    |       |      |
|                |       | Occipital_Mid_R    | 2.86          | 1921                | 8.85        | 2098 |       |      |
|                |       | Cerebellum_Crus1_R | 2.60          | 1921                | 6.37        | 2648 |       |      |
|                |       | Temporal_Inf_L     | 1.72          | 1921                | 3.40        | 1200 |       |      |
|                |       | Calcarius_L        | 1.56          | 1921                | 4.48        | 2258 |       |      |
|                |       | Calcarius_R        | 1.41          | 1921                | 4.90        | 1861 |       |      |
|                |       | Temporal_Mid_L     | 0.57          | 1921                | 0.75        | 4942 |       |      |
|                |       | Wernis_S           | 0.52          | 1921                | 9.10        | 371  |       |      |
|                |       | Cerebellum_Crus2_L | 0.47          | 1921                | 1.60        | 1894 |       |      |
|                |       | Occipital_Sup_L    | 0.47          | 1921                | 2.22        | 1366 |       |      |
|                |       | Cuneus_R           | 0.26          | 1921                | 1.19        | 1424 |       |      |
|                |       | Occipital_Sup_R    | 0.16          | 1921                | 0.72        | 1413 |       |      |
|                |       | Temporal_Sup_R     | 0.05          | 1921                | 0.11        | 3141 |       |      |
|                |       | 11                 | 28            | <u>Precentral_R</u> | 27.53       | 563  | 15.47 | 3381 |
|                |       |                    |               | Frontal_Inf_Oper_R  | 25.58       | 563  | 34.74 | 1399 |
|                |       |                    |               | Frontal_Inf_Tri_R   | 24.16       | 563  | 21.34 | 2151 |
|                |       |                    |               | Frontal_Mid_R       | 18.12       | 563  | 6.74  | 5104 |
|                |       |                    |               | OUTSIDE             | 3.55        | 563  | 0.00  | 0    |
|                |       |                    |               | Frontal_Inf_Opb_R   | 0.71        | 563  | 0.79  | 1707 |
|                |       |                    |               | Frontal_Sup_R       | 0.36        | 563  | 0.17  | 4056 |
| Angular_R      | 35.71 |                    |               | 168                 | 11.56       | 1752 |       |      |
| OUTSIDE        | 29.17 |                    |               | 168                 | 0.00        | 0    |       |      |
| Parietal_Inf_R | 17.86 |                    |               | 168                 | 7.53        | 1345 |       |      |
| -52            | 43    | Occipital_Sup_R    | 13.10         | 168                 | 5.25        | 1413 |       |      |
|                |       | Occipital_Mid_R    | 2.38          | 168                 | 0.64        | 2098 |       |      |
|                |       | Parietal_Sup_R     | 1.79          | 168                 | 0.46        | 2222 |       |      |
|                |       | Precentral_L       | 56.65         | 203                 | 11.01       | 3526 |       |      |
| -1             | 40    | Frontal_Inf_Tri_L  | 28.60         | 203                 | 5.60        | 2428 |       |      |
|                |       | Frontal_Inf_Oper_L | 11.82         | 203                 | 7.80        | 1038 |       |      |
|                |       | Postcentral_L      | 7.88          | 203                 | 1.39        | 3892 |       |      |
|                |       | Frontal_Mid_L      | 2.96          | 203                 | 0.42        | 4863 |       |      |
| -48            | 49    | Parietal_Inf_L     | 88.49         | 123                 | 13.65       | 2447 |       |      |
|                |       | Parietal_Sup_L     | 17.89         | 123                 | 3.60        | 2065 |       |      |
|                |       | Angular_L          | 1.63          | 123                 | 0.58        | 1173 |       |      |
|                |       | Supp_Motor_Area_L  | 64.86         | 37                  | 3.77        | 2147 |       |      |
| -1             | 61    | Supp_Motor_Area_R  | 32.43         | 37                  | 1.71        | 2371 |       |      |
|                |       | OUTSIDE            | 2.70          | 37                  | 0.00        | 0    |       |      |

Data of nonapathy patients under neutral stimuli

| z mm               | Label | % Cluster          | Nb Vx Cluster | % Label            | Nb Vx Label |      |       |      |
|--------------------|-------|--------------------|---------------|--------------------|-------------|------|-------|------|
| -97                | -2    | Occipital_Mid_L    | 28.64         | 220                | 6.50        | 3270 |       |      |
|                    |       | Occipital_Inf_L    | 27.27         | 220                | 21.52       | 941  |       |      |
|                    |       | Lingual_L          | 20.00         | 220                | 7.09        | 2095 |       |      |
|                    |       | <u>Fusiform_L</u>  | 10.00         | 220                | 3.21        | 2310 |       |      |
|                    |       | Cerebellum_Crus1_L | 4.00          | 220                | 1.17        | 2603 |       |      |
|                    |       | Calcarius_L        | 4.09          | 220                | 1.35        | 2258 |       |      |
|                    |       | OUTSIDE            | 3.64          | 220                | 0.00        | 0    |       |      |
|                    |       | Occipital_Sup_L    | 2.27          | 220                | 1.24        | 1366 |       |      |
|                    |       | -88                | 1             | <u>Fusiform_R</u>  | 22.65       | 574  | 17.42 | 2518 |
|                    |       |                    |               | Occipital_Inf_R    | 14.29       | 574  | 27.98 | 989  |
|                    |       |                    |               | Cerebellum_6_R     | 13.94       | 574  | 15.04 | 1795 |
|                    |       |                    |               | Cerebellum_Crus1_R | 13.24       | 574  | 9.69  | 2648 |
| Lingual_R          | 9.41  |                    |               | 574                | 7.92        | 2308 |       |      |
| Occipital_Mid_R    | 6.79  |                    |               | 574                | 6.27        | 2098 |       |      |
| OUTSIDE            | 4.53  |                    |               | 574                | 0.00        | 0    |       |      |
| Cerebellum_Crus2_R | 4.36  |                    |               | 574                | 3.99        | 2117 |       |      |
| Temporal_Inf_R     | 4.36  |                    |               | 574                | 2.37        | 3557 |       |      |
| Calcarius_R        | 3.66  |                    |               | 574                | 3.81        | 1861 |       |      |
| Cerebellum_8_R     | 1.57  |                    |               | 574                | 1.32        | 2308 |       |      |
| Temporal_Mid_R     | 0.87  |                    |               | 574                | 0.38        | 4409 |       |      |
| -78                | -47   | Occipital_Sup_R    | 0.17          | 574                | 0.24        | 1413 |       |      |
|                    |       | Cuneus_R           | 0.17          | 574                | 0.24        | 1424 |       |      |
|                    |       | Cerebellum_8_L     | 38.30         | 94                 | 6.44        | 1887 |       |      |
|                    |       | Cerebellum_8b_L    | 31.91         | 94                 | 17.31       | 585  |       |      |
|                    |       | Cerebellum_Crus2_L | 28.72         | 94                 | 4.81        | 1894 |       |      |
|                    |       | Cerebellum_Crus1_L | 1.06          | 94                 | 0.13        | 2603 |       |      |
|                    |       | OUTSIDE            | 37.50         | 24                 | 0.00        | 0    |       |      |
|                    |       | Parietal_Inf_R     | 33.33         | 24                 | 2.01        | 1345 |       |      |
|                    |       | Angular_R          | 29.17         | 24                 | 1.35        | 1752 |       |      |
|                    |       | 8                  | 28            | Frontal_Inf_Oper_R | 45.15       | 26   | 2.89  | 1399 |
|                    |       |                    |               | Precentral_R       | 38.46       | 26   | 1.00  | 3381 |
|                    |       |                    |               | Frontal_Mid_R      | 15.38       | 26   | 0.26  | 5104 |

Data of apathy patients under neutral stimuli
